# Supplementary material for: Modeling and Predicting Outcomes of eHealth Usage by European Physicians: Multidimensional Approach from a Survey of 9196 General Practitioners
Source: PubMed Central journal article supplement (PMC6231736; doi:10.2196/jmir.9253), 2018-10-22
Supplement: jmir_v20i10e279_app4.pdf [file jmir_v20i10e279_app4.pdf]

**Appendix 4a.** Barriers to eHealth usage by European general practitioners descriptive statistics. 2012-2013

|                                                                         | N     | Mean | Std. Dev. | Minimum | Maximum | Skewness | Kurtosis |
|-------------------------------------------------------------------------|-------|------|-----------|---------|---------|----------|----------|
| 6. Lack of financial incentives                                         | 9,196 | 2.81 | 1.180     | 0       | 4       | -0.838   | -0.201   |
| 7. Lack of financial resources                                          | 9,196 | 2.81 | 1.175     | 0       | 4       | -0.846   | -0.164   |
| 8. Lack of access to the technology                                     | 9,196 | 2.44 | 1.153     | 0       | 4       | -0.331   | -0.819   |
| 9. Lack of technical support                                            | 9,196 | 2.57 | 1.141     | 0       | 4       | -0.519   | -0.583   |
| 10. Lack of inter-operability and standards                             | 9,196 | 2.61 | 1.303     | 0       | 4       | -0.767   | -0.518   |
| 11. Lack of sufficient resilience –ICT systems can fail-                | 9,196 | 2.63 | 1.175     | 0       | 4       | -0.780   | -0.186   |
| 12. Lack of sufficient security and risk control                        | 9,196 | 2.54 | 1.195     | 0       | 4       | -0.612   | -0.490   |
| 13. Lack of framework on confidentiality and privacy issues             | 9,196 | 2.58 | 1.237     | 0       | 4       | -0.625   | -0.695   |
| 14. Lack of time –additional workload-                                  | 9,196 | 2.80 | 1.131     | 0       | 4       | -0.730   | -0.361   |
| 15. Lack of sufficient ICT skills by general practitioners              | 9,196 | 2.75 | 1.061     | 0       | 4       | -0.787   | 0.054    |
| 16. Lack of sufficient training for health care professionals           | 9,196 | 2.82 | 1.052     | 0       | 4       | -0.860   | 0.213    |
| 17. Lack of clear motivation to use ICT                                 | 9,196 | 2.47 | 1.143     | 0       | 4       | -0.375   | -0.791   |
| 18. Increased patients expectations                                     | 9,196 | 2.32 | 1.203     | 0       | 4       | -0.380   | -0.760   |
| 19. Lack of framework on using e-mail between doctors and patients      | 9,196 | 2.58 | 1.273     | 0       | 4       | -0.721   | -0.530   |
| 20. Lack of remuneration for additional work answering patients e-mails | 9,196 | 2.92 | 1.236     | 0       | 4       | -1.028   | 0.002    |
| 21. Difficult to use                                                    | 9,196 | 2.20 | 1.079     | 0       | 4       | -0.132   | -0.732   |

Source: Own elaboration.

**Appendix 4b.** Barriers to eHealth usage by European general practitioners frequency statistics. 2012-2013

|                                                                         | N     | Valid percentage* |      |      |      |      |
|-------------------------------------------------------------------------|-------|-------------------|------|------|------|------|
|                                                                         |       | 0                 | 1    | 2    | 3    | 4    |
| 6. Lack of financial incentives                                         | 9,196 | 5.8               | 10.3 | 15.8 | 33.9 | 34.3 |
| 7. Lack of financial resources                                          | 9,196 | 5.7               | 9.9  | 16.1 | 33.9 | 34.4 |
| 8. Lack of access to the technology                                     | 9,196 | 5.2               | 18.7 | 23.2 | 33.0 | 20.0 |
| 9. Lack of technical support                                            | 9,196 | 5.0               | 14.7 | 21.2 | 36.0 | 23.0 |
| 10. Lack of inter-operability and standards                             | 9,196 | 11.8              | 8.9  | 14.8 | 35.7 | 28.8 |
| 11. Lack of sufficient resilience –ICT systems can fail-                | 9,196 | 7.9               | 9.4  | 18.4 | 40.1 | 24.3 |
| 12. Lack of sufficient security and risk control                        | 9,196 | 8.1               | 11.6 | 21.2 | 35.9 | 23.1 |
| 13. Lack of framework on confidentiality and privacy issues             | 9,196 | 8.4               | 12.1 | 19.1 | 33.3 | 27.1 |
| 14. Lack of time –additional workload-                                  | 9,196 | 3.7               | 12.2 | 16.8 | 34.4 | 32.8 |
| 15. Lack of sufficient ICT skills by general practitioners              | 9,196 | 4.0               | 10.1 | 18.1 | 43.0 | 24.9 |
| 16. Lack of sufficient training for health care professionals           | 9,196 | 3.6               | 9.0  | 16.8 | 42.4 | 28.1 |
| 17. Lack of clear motivation to use ICT                                 | 9,196 | 4.8               | 18.7 | 21.4 | 35.3 | 19.8 |
| 18. Increased patients expectations                                     | 9,196 | 9.6               | 15.6 | 24.9 | 32.9 | 17.0 |
| 19. Lack of framework on using e-mail between doctors and patients      | 9,196 | 10.6              | 10.3 | 15.9 | 36.5 | 26.7 |
| 20. Lack of remuneration for additional work answering patients e-mails | 9,196 | 7.1               | 9.0  | 11.5 | 30.0 | 42.4 |
| 21. Difficult to use                                                    | 9,196 | 5.6               | 22.3 | 30.0 | 30.9 | 11.2 |

\* 0= I don't know; 1=Strongly disagree; 2=Somewhat disagree; 3=Somewhat agree; 4=Strongly agree.

Source: Own elaboration.
