# Supplementary material for: Modeling and Predicting Outcomes of eHealth Usage by European Physicians: Multidimensional Approach from a Survey of 9196 General Practitioners
Source: PubMed Central journal article supplement (PMC6231736; doi:10.2196/jmir.9253), 2018-10-22
Supplement: jmir_v20i10e279_app5.pdf [file jmir_v20i10e279_app5.pdf]

**Appendix 5a.** Personal Health Records (PHR) usage by European general practitioners descriptive statistics. 2012-2013

|                                       | N     | Mean | Std. Dev. | Minimum | Maximum | Skewness | Kurtosis |
|---------------------------------------|-------|------|-----------|---------|---------|----------|----------|
| 22. Request referrals                 | 9,196 | 0.06 | 0.234     | 0       | 1       | 3.784    | 12.322   |
| 23. Request appointments              | 9,196 | 0.14 | 0.345     | 0       | 1       | 2.054    | 2.219    |
| 24. Request renewals or prescriptions | 9,196 | 0.10 | 0.305     | 0       | 1       | 2.598    | 4.748    |
| 25. View their medical records        | 9,196 | 0.03 | 0.163     | 0       | 1       | 5.778    | 31.394   |
| 26. Supplement their medical records  | 9,196 | 0.02 | 0.140     | 0       | 1       | 6.837    | 44.754   |
| 27. View test results                 | 9,196 | 0.04 | 0.198     | 0       | 1       | 4.631    | 19.447   |

Source: Own elaboration.

**Appendix 5b.** Personal Health Records (PHR) usage by European general practitioners frequency statistics. 2012-2013

|                                       | N     | Valid percentage* |      |
|---------------------------------------|-------|-------------------|------|
|                                       |       | 0                 | 1    |
| 22. Request referrals                 | 9,196 | 94.2              | 5.8  |
| 23. Request appointments              | 9,196 | 85.8              | 14.2 |
| 24. Request renewals or prescriptions | 9,196 | 89.6              | 10.4 |
| 25. View their medical records        | 9,196 | 97.2              | 2.8  |
| 26. Supplement their medical records  | 9,196 | 98.0              | 2.0  |
| 27. View test results                 | 9,196 | 95.9              | 4.1  |

\* 0= Not use or not availability; 1=Use.

Source: Own elaboration.
