# Supplementary material for: Modeling and Predicting Outcomes of eHealth Usage by European Physicians: Multidimensional Approach from a Survey of 9196 General Practitioners
Source: PubMed Central journal article supplement (PMC6231736; doi:10.2196/jmir.9253), 2018-10-22
Supplement: jmir_v20i10e279_app9.pdf [file jmir_v20i10e279_app9.pdf]

**Appendix 9a.** Electronic Health Records\_ Data (EHR\_DAT) usage by European general practitioners descriptive statistics. 2012-2013

|                                                                    | N     | Mean | Std. Dev. | Minimum | Maximum | Skewness | Kurtosis |
|--------------------------------------------------------------------|-------|------|-----------|---------|---------|----------|----------|
| 53. Basic medical parameters (i.e. allergies)                      | 9,196 | 0.81 | 0.390     | 0       | 1       | -1.601   | 0.563    |
| 54. Vital signs                                                    | 9,196 | 0.73 | 0.443     | 0       | 1       | -1.041   | -0.916   |
| 55. Treatment outcomes                                             | 9,196 | 0.75 | 0.435     | 0       | 1       | -1.134   | -0.714   |
| 56. Problem list / diagnoses                                       | 9,196 | 0.81 | 0.389     | 0       | 1       | -1.614   | 0.604    |
| 57. Medication list                                                | 9,196 | 0.84 | 0.367     | 0       | 1       | -1.853   | 1.435    |
| 58. Immunizations                                                  | 9,196 | 0.78 | 0.412     | 0       | 1       | -1.378   | -0.102   |
| 59. Medical history                                                | 9,196 | 0.81 | 0.390     | 0       | 1       | -1.605   | 0.578    |
| 60. Patient demographics                                           | 9,196 | 0.68 | 0.467     | 0       | 1       | -0.764   | -1.417   |
| 61. Laboratory test results                                        | 9,196 | 0.81 | 0.393     | 0       | 1       | -1.572   | 0.471    |
| 62. Radiology test reports                                         | 9,196 | 0.67 | 0.471     | 0       | 1       | -0.708   | -1.499   |
| 63. Radiology test images                                          | 9,196 | 0.30 | 0.458     | 0       | 1       | 0.876    | -1.232   |
| 64. Symptoms (reported by patient)                                 | 9,196 | 0.78 | 0.415     | 0       | 1       | -1.342   | -0.198   |
| 65. Reason for appointment                                         | 9,196 | 0.77 | 0.422     | 0       | 1       | -1.274   | -0.377   |
| 66. Clinical notes                                                 | 9,196 | 0.79 | 0.405     | 0       | 1       | -1.448   | 0.096    |
| 67. Prescriptions / medications                                    | 9,196 | 0.85 | 0.360     | 0       | 1       | -1.929   | 1.723    |
| 68. Ordered tests                                                  | 9,196 | 0.75 | 0.431     | 0       | 1       | -1.172   | -0.627   |
| 69. Create / update disease management / care plan (i.e. diabetes) | 9,196 | 0.65 | 0.477     | 0       | 1       | -0.627   | -1.607   |
| 70. Finances / billing                                             | 9,196 | 0.45 | 0.498     | 0       | 1       | 0.180    | -1.968   |
| 71. Administrative patient data                                    | 9,196 | 0.76 | 0.425     | 0       | 1       | -1.240   | -0.464   |

Source: Own elaboration.

**Appendix 9b.** Electronic Health Records\_ Data (EHR\_DAT) usage by European general practitioners frequency statistics. 2012-2013

|                                                                    | N     | Valid percentage* |      |
|--------------------------------------------------------------------|-------|-------------------|------|
|                                                                    |       | 0                 | 1    |
| 53. Basic medical parameters (i.e. allergies)                      | 9,196 | 18.8              | 81.2 |
| 54. Vital signs                                                    | 9,196 | 26.9              | 73.1 |
| 55. Treatment outcomes                                             | 9,196 | 25.3              | 74.7 |
| 56. Problem list / diagnoses                                       | 9,196 | 18.6              | 81.4 |
| 57. Medication list                                                | 9,196 | 16.0              | 84.0 |
| 58. Immunizations                                                  | 9,196 | 21.6              | 78.4 |
| 59. Medical history                                                | 9,196 | 18.7              | 81.3 |
| 60. Patient demographics                                           | 9,196 | 32.2              | 67.8 |
| 61. Laboratory test results                                        | 9,196 | 19.1              | 80.9 |
| 62. Radiology test reports                                         | 9,196 | 33.3              | 66.7 |
| 63. Radiology test images                                          | 9,196 | 70.1              | 29.9 |
| 64. Symptoms (reported by patient)                                 | 9,196 | 22.1              | 77.9 |
| 65. Reason for appointment                                         | 9,196 | 23.1              | 76.9 |
| 66. Clinical notes                                                 | 9,196 | 20.7              | 79.3 |
| 67. Prescriptions / medications                                    | 9,196 | 15.3              | 84.7 |
| 68. Ordered tests                                                  | 9,196 | 24.7              | 75.3 |
| 69. Create / update disease management / care plan (i.e. diabetes) | 9,196 | 35.0              | 65.0 |
| 70. Finances / billing                                             | 9,196 | 54.5              | 45.5 |
| 71. Administrative patient data                                    | 9,196 | 23.7              | 76.3 |

\* 0= Not use or not availability; 1=Use. Source: Own elaboration.
