# Supplementary material for: Modeling and Predicting Outcomes of eHealth Usage by European Physicians: Multidimensional Approach from a Survey of 9196 General Practitioners
Source: PubMed Central journal article supplement (PMC6231736; doi:10.2196/jmir.9253), 2018-10-22
Supplement: jmir_v20i10e279_app12.pdf [file jmir_v20i10e279_app12.pdf]

**Multimedia Appendix 12.** Explanatory factors of some dimensions of European general practitioners' eHealth usage and eHealth usage outcomes in 2012-2013.

| Dimension/variable                                                                                                                                                                    |                                                                                  | Standardized coefficient | P value | Error | P value |
|---------------------------------------------------------------------------------------------------------------------------------------------------------------------------------------|----------------------------------------------------------------------------------|--------------------------|---------|-------|---------|
| <b>1. ICT usage (ICTUS)</b>                                                                                                                                                           |                                                                                  |                          |         | 0.028 | <.001   |
| 1.                                                                                                                                                                                    | Internet usage during consultations                                              | 0.245                    | <.001   | 0.443 | <.001   |
| 2.                                                                                                                                                                                    | Computer usage in general practice                                               | 0.064                    | <.001   | 0.003 | <.001   |
| 3.                                                                                                                                                                                    | Computer usage to display patients' health-related information                   | 0.287                    | <.001   | 0.441 | <.001   |
| 4.                                                                                                                                                                                    | Problems of compatibility in electronically exchanging patient data              | 0.481                    | <.001   | 1.215 | <.001   |
| 5.                                                                                                                                                                                    | Medical organizations in contact with general practitioner                       | 0.640                    | <.001   | 2.840 | <.001   |
| Goodness-of-fit indices: NFI <sup>b</sup> : 0.996; RFI <sup>c</sup> : 0.984; IFI <sup>d</sup> : 0.997; TLI <sup>e</sup> : 0.990; CFI <sup>f</sup> : 0.997; RMSEA <sup>g</sup> : 0.012 |                                                                                  |                          |         |       |         |
| <b>2. Barriers to eHealth usage (BARRIERS)</b>                                                                                                                                        |                                                                                  |                          |         | 0.513 | <.001   |
| 6.                                                                                                                                                                                    | Lack of financial incentives                                                     | 0.607                    | <.001   | 0.881 | <.001   |
| 7.                                                                                                                                                                                    | Lack of financial resources                                                      | 0.632                    | <.001   | 0.821 | <.001   |
| 8.                                                                                                                                                                                    | Lack of access to technology                                                     | 0.631                    | <.001   | 0.797 | <.001   |
| 9.                                                                                                                                                                                    | Lack of technical support                                                        | 0.649                    | <.001   | 0.748 | <.001   |
| 10.                                                                                                                                                                                   | Lack of interoperability and standards                                           | 0.597                    | <.001   | 1.084 | <.001   |
| 11.                                                                                                                                                                                   | Lack of sufficient resilience –ICT <sup>h</sup> systems can fail                 | 0.653                    | <.001   | 0.788 | <.001   |
| 12.                                                                                                                                                                                   | Lack of sufficient security and risk control                                     | 0.643                    | <.001   | 0.833 | <.001   |
| 13.                                                                                                                                                                                   | Lack of framework on confidentiality and privacy issues                          | 0.655                    | <.001   | 0.874 | <.001   |
| 14.                                                                                                                                                                                   | Lack of time – additional workload                                               | 0.681                    | <.001   | 0.687 | <.001   |
| 15.                                                                                                                                                                                   | Lack of sufficient ICT skills among general practitioners                        | 0.663                    | <.001   | 0.628 | <.001   |
| 16.                                                                                                                                                                                   | Lack of sufficient training for healthcare professionals                         | 0.673                    | <.001   | 0.605 | <.001   |
| 17.                                                                                                                                                                                   | Lack of clear motivation for using ICT                                           | 0.623                    | <.001   | 0.798 | <.001   |
| 18.                                                                                                                                                                                   | Increased patient expectations                                                   | 0.528                    | <.001   | 1.042 | <.001   |
| 19.                                                                                                                                                                                   | Lack of framework on using e-mail for communication between doctors and patients | 0.574                    | <.001   | 1.089 | <.001   |
| 20.                                                                                                                                                                                   | Lack of remuneration for additional work answering patients e-mails              | 0.548                    | <.001   | 1.069 | <.001   |
| 21.                                                                                                                                                                                   | Difficult to use                                                                 | 0.629                    | <.001   | 0.703 | <.001   |
| Goodness-of-fit indices: NFI: 0.984; RFI: 0.975; IFI: 0.985; TLI: 0.977; CFI: 0.985; RMSEA: 0.040                                                                                     |                                                                                  |                          |         |       |         |
| <b>8. eHealth usage outcomes in internal practices (OUTINTPRA)</b>                                                                                                                    |                                                                                  |                          |         | 0.456 | <.001   |
| 72.                                                                                                                                                                                   | Useful for my practice                                                           | 0.717                    | <.001   | 0.430 | <.001   |
| 73.                                                                                                                                                                                   | Increases the number of patients I can see on average during working hours       | 0.624                    | <.001   | 0.936 | <.001   |
| 74.                                                                                                                                                                                   | Enhances effectiveness of job                                                    | 0.735                    | <.001   | 0.548 | <.001   |
| 75.                                                                                                                                                                                   | Increases quality of care                                                        | 0.686                    | <.001   | 0.679 | <.001   |
| 76.                                                                                                                                                                                   | Easy to use                                                                      | 0.801                    | <.001   | 0.419 | <.001   |
| 77.                                                                                                                                                                                   | Easy to get it to do what I want                                                 | 0.769                    | <.001   | 0.511 | <.001   |
| 78.                                                                                                                                                                                   | Flexible to use / interact with                                                  | 0.744                    | <.001   | 0.583 | <.001   |
| 79.                                                                                                                                                                                   | Colleagues who are important to me think I should use ICT systems                | 0.477                    | <.001   | 1.725 | <.001   |
| 80.                                                                                                                                                                                   | People who influence my behavior think I should use ICT systems                  | 0.442                    | <.001   | 1.754 | <.001   |
| 81.                                                                                                                                                                                   | People who influence my clinical behavior think I should use ICT systems         | 0.435                    | <.001   | 1.762 | <.001   |
| 82.                                                                                                                                                                                   | I have the necessary resources to use ICT systems                                | 0.628                    | <.001   | 0.819 | <.001   |
| 83.                                                                                                                                                                                   | I have the knowledge to use ICT systems                                          | 0.627                    | <.001   | 0.681 | <.001   |
| 84.                                                                                                                                                                                   | I have technical assistance available                                            | 0.558                    | <.001   | 0.887 | <.001   |
| 85.                                                                                                                                                                                   | Using ICT systems is entirely under my control                                   | 0.616                    | <.001   | 0.838 | <.001   |
| Goodness-of-fit indices: NFI: 0.991; RFI: 0.986; IFI: 0.992; TLI: 0.987; CFI: 0.992; RMSEA: 0.037                                                                                     |                                                                                  |                          |         |       |         |
| <b>9. eHealth usage outcomes in practices with patients (OUTPRAPAT)</b>                                                                                                               |                                                                                  |                          |         | 0.730 | <.001   |

|                                                                                                   |                                                                                          |       |       |       |       |
|---------------------------------------------------------------------------------------------------|------------------------------------------------------------------------------------------|-------|-------|-------|-------|
| 86.                                                                                               | Reduce medical errors                                                                    | 0.740 | <.001 | 0.604 | <.001 |
| 87.                                                                                               | Improvement in the quality of diagnosis decisions                                        | 0.783 | <.001 | 0.495 | <.001 |
| 88.                                                                                               | Improvement in the quality of treatment                                                  | 0.784 | <.001 | 0.495 | <.001 |
| 89.                                                                                               | Enhance self-evaluation                                                                  | 0.696 | <.001 | 0.769 | <.001 |
| 90.                                                                                               | More data for clinical research and public health                                        | 0.665 | <.001 | 0.669 | <.001 |
| 91.                                                                                               | Facilitate patients' education and adherence to prescriptions                            | 0.723 | <.001 | 0.652 | <.001 |
| 92.                                                                                               | Improvement in patient satisfaction                                                      | 0.707 | <.001 | 0.759 | <.001 |
| 93.                                                                                               | Increased patient access to healthcare (e.g., booking online appointments, viewing data) | 0.647 | <.001 | 0.823 | <.001 |
| 94.                                                                                               | Avoid unnecessary tests and duplications                                                 | 0.710 | <.001 | 0.577 | <.001 |
| 95.                                                                                               | Increase average number of patients receiving help during one day                        | 0.697 | <.001 | 0.749 | <.001 |
| 96.                                                                                               | Reduce pharmaceutical expenditure                                                        | 0.649 | <.001 | 0.945 | <.001 |
| 97.                                                                                               | Shorter waiting lists                                                                    | 0.677 | <.001 | 0.823 | <.001 |
| 98.                                                                                               | Allow more efficient consultations                                                       | 0.767 | <.001 | 0.541 | <.001 |
| 99.                                                                                               | Improvement in coordination between the different levels of the healthcare system        | 0.720 | <.001 | 0.592 | <.001 |
| 100.                                                                                              | Expedite workflow due to the availability of patients' clinical data                     | 0.741 | <.001 | 0.555 | <.001 |
| 101.                                                                                              | Improvement in the efficiency of the whole healthcare system                             | 0.797 | <.001 | 0.448 | <.001 |
| Goodness-of-fit indices: NFI: 0.989; RFI: 0.983; IFI: 0.990; TLI: 0.984; CFI: 0.990; RMSEA: 0.038 |                                                                                          |       |       |       |       |

<sup>a</sup>Regression analysis: structural equation modeling (SEM); direct effects.

<sup>b</sup>NFI: normed fit index

<sup>c</sup>RFI: relative fit index.

<sup>d</sup>IFI: incremental fit index.

<sup>e</sup>TLI: Tucker-Lewis index

<sup>f</sup>CFI: comparative fit index.

<sup>g</sup>RMSEA: root mean square error of approximation

<sup>h</sup>ICT: information and communication technology
